# Supplementary material for: NESTML: a generic modeling language and code generation tool for the simulation of spiking neural networks with advanced plasticity rules
Source: Frontiers journal article supplement (doi:10.3389/fninf.2025.1544143), 2025-06-04
Supplement: Data_Sheet_1.pdf [file Data_Sheet_1.pdf]

# Supplementary Material

## 1 SUPPLEMENTARY MATERIAL

### 1.1 Supplementary Material A: NESTML language elements

| Keyword(s)                                                                                       | Description                                      |
|--------------------------------------------------------------------------------------------------|--------------------------------------------------|
| integer, real, string, types<br>boolean, mV, J/(mol*K),<br>C*J*s**-1,...                         |                                                  |
| min,max,exp,sinh,erfc,...                                                                        | mathematical functions                           |
| random_normal,<br>random_uniform                                                                 | draw sample from statistical distribution        |
| if..elif..else                                                                                   | conditional statements                           |
| while..do,for                                                                                    | loop statements                                  |
| function,return                                                                                  | definition of functions                          |
| +, -, *, **, %,  , &, <<, +=, <=, ...                                                            | expressions, bit operators, assignment operators |
| ', inline                                                                                        | ODE and inline expression definition             |
| <, <=, !=, ...                                                                                   | conditional expressions                          |
| true,false,inf,"..."                                                                             | literal values                                   |
| [, ]                                                                                             | vector operations                                |
| timestep, steps, t                                                                               | simulation timing functions and time variable    |
| integrate_odes                                                                                   | integrate ODEs                                   |
| print,println                                                                                    | printing/logging functions for debugging         |
| emit_spike                                                                                       | emit spike event                                 |
| equations, input, output,<br>update, state, parameters,<br>internals, onReceive,<br>onCondition, | model blocks                                     |
| spike,continuous                                                                                 | input/output port designations                   |

**Table S1.** An overview of syntactical elements of the NESTML language

## 1.2 Supplementary Material B: NESTML model checks

| Description                                                                                                           |
|-----------------------------------------------------------------------------------------------------------------------|
| Each called function is defined and parameter types are consistent                                                    |
| Each block is defined at most once                                                                                    |
| Each variable is defined at most once within each scope.                                                              |
| Each variable used in an expression has been defined.                                                                 |
| All state variables are assigned an initial value                                                                     |
| Input ports are not assigned to.                                                                                      |
| All ODEs are of order greater than 0.                                                                                 |
| Physical unit literals are correct (e.g. “1/mV” but not “2/mV”).                                                      |
| For files containing multiple models, model names are unique.                                                         |
| Spiking input ports have unique qualifier keywords; “continuous” type input ports have no qualifiers.                 |
| All defined kernels have the type <code>real</code> .                                                                 |
| Parameters and internals are not assigned outside the parameters (resp. internals) block.                             |
| If the <code>emit_spike()</code> function is called anywhere in the model, a spiking output port is defined.          |
| All expressions and ODEs have consistent units on the left- and right-hand sides of the equation.                     |
| If ODEs are defined, the <code>integrate_odes()</code> function is called at least once in the model.                 |
| Functions defined in the model have consistent units and contain a “return” statement.                                |
| The variable on the left-hand side of an ODE definition has been declared in the “state” block.                       |
| Arguments to the <code>convolve()</code> function are correct.                                                        |
| Kernels are used only in convolutions. Dirac delta functions may only have the time $t$ as a single argument.         |
| All invariants evaluate to a boolean type.                                                                            |
| Operations on vectors are consistent in terms of operating on vectors of the same length.                             |
| All declared vectors have a size greater than 0.                                                                      |
| For synapse models, the “priority” parameter on event handlers has correct (unique and non-negative) priority values. |

**Table S2.** List of context condition checks for NESTML models

### 1.3 Supplementary Material C: Alternative version of the neuron model

```
1 model aeif_psc_alpha_neuron:
2   state:
3     V_m mV = E_L          # Membrane potential
4     I_adap pA = 0 pA       # Spike-adaptation current
5     I_syn pA = 0 nS        # AHP conductance
6     I_syn' pA/ms = 0 nS/ms # AHP conductance
7
8   equations:
9     I_syn'' = -2 * I_syn' / tau_syn - I_syn / tau_syn**2
10    inline I_spike pA = g_L * Delta_T * (V_m - V_th) / Delta_T
11    inline I_leak pA = -g_L * (V_m - E_L)
12    V_m' = (I_leak + I_spike + I_syn - I_adap + I_stim) / C_m
13    I_adap' = (a * (V_m - E_L) - I_adap) / tau_adap
14
15   parameters:
16     C_m pF = 281 pF        # Membrane capacitance
17     g_L nS = 30 nS         # Leak conductance
18     E_L mV = -70.6 mV      # Leak reversal potential
19     a nS = 4 nS            # Subthreshold adaptation
20     b pA = 80.5 pA         # Spike-triggered adaptation
21     Delta_T mV = 2 mV      # Slope factor
22     tau_adap ms = 144 ms   # Adaptation time constant
23     V_th mV = -50.4 mV     # Spike initiation threshold
24     V_peak mV = 0 mV       # Spike detection threshold
25     tau_syn ms = 0.5 ms    # Synaptic time constant
26
27   input:
28     spikes <- spike
29     I_stim pA <- continuous
30
31   output:
32     spike
33
34   update:
35     integrate_odes()
36
37   onCondition(V_m >= V_peak): # Threshold crossing detection
38     V_m = E_L                # Reset potential
39     I_adap += b
40     emit_spike()
41
42   onReceive(spikes):          # Spike input
43     I_syn' += spikes * (e / tau_syn)
```

Listing 1: An alternative version of the adaptive exponential integrate-and-fire neuron model with alpha-shaped postsynaptic currents. In this version, spikes are processed in an event handler (lines 42-43) instead of using convolutions (compare Listing 2, lines 7 and 10).

## 1.4 Supplementary Material D: Balanced network model description

| A: Model summary      |                                                            |
|-----------------------|------------------------------------------------------------|
| <b>Populations</b>    | Three: excitatory, inhibitory, external input              |
| <b>Topology</b>       | —                                                          |
| <b>Connectivity</b>   | Random convergent connections                              |
| <b>Neuron model</b>   | See Section 3.1.1                                          |
| <b>Channel models</b> | —                                                          |
| <b>Synapse model</b>  | See Section 3.1.2                                          |
| <b>Plasticity</b>     | —                                                          |
| <b>Input</b>          | Independent fixed-rate Poisson spike trains to all neurons |
| <b>Measurements</b>   | Spike activity                                             |

| B: Populations   |                   |                  |
|------------------|-------------------|------------------|
| Name             | Elements          | Size             |
| E                | aeif_psc_alpha    | $N_E = 4N_I$     |
| I                | aeif_psc_alpha    | $N_I$            |
| $E_{\text{ext}}$ | Poisson generator | $C_E(N_E + N_I)$ |

| C: Connectivity |                  |         |                                                              |
|-----------------|------------------|---------|--------------------------------------------------------------|
| Name            | Source           | Target  | Pattern                                                      |
| EE              | E                | E       | Random with fixed in-degree $C_E$ , weight $J$ , delay $d$   |
| IE              | I                | E       | Random with fixed in-degree $C_E$ , weight $J$ , delay $d$   |
| EI              | E                | I       | Random with fixed in-degree $C_I$ , weight $-gJ$ , delay $d$ |
| II              | I                | I       | Random with fixed in-degree $C_I$ , weight $-gJ$ , delay $d$ |
| Ext             | $E_{\text{ext}}$ | E and I | Fixed in-degree $C_E$ , weight $J$ , delay $d$               |

| D: Neuron and synapse model  |                                                                                      |
|------------------------------|--------------------------------------------------------------------------------------|
| <b>Name</b>                  | aeif_psc_alpha                                                                       |
| <b>Type</b>                  | Adaptive exponential integrate-and-fire with alpha-shape postsynaptic current kernel |
| <b>Subthreshold dynamics</b> | See Section 3.1.1                                                                    |
| <b>Spiking</b>               | See Section 3.1.2                                                                    |

| Neuron model parameters |                            |       |      |
|-------------------------|----------------------------|-------|------|
| Name                    | Description                | Value | Unit |
| $C_m$                   | Membrane capacitance       | 250   | pF   |
| $g_L$                   | Leak conductance           | 12.5  | nS   |
| $E_L$                   | Leak reversal potential    | 0     | mV   |
| $a$                     | Subthreshold adaptation    | 4     | nS   |
| $b$                     | Spike-triggered adaptation | 80.5  | pA   |
| $\Delta_T$              | Slope factor               | 2     | mV   |
| $\tau_w$                | Adaptation time constant   | 144   | ms   |
| $V_{th}$                | Spike initiation threshold | 20    | mV   |
| $V_{peak}$              | Spike detection threshold  | 20    | mV   |
| $\tau_{syn}$            | Synaptic time constant     | 0.5   | ms   |

| Synapse model parameters |                              |       |      |
|--------------------------|------------------------------|-------|------|
| Name                     | Description                  | Value | Unit |
| $d$                      | Synaptic delay               | 1     | ms   |
| $\tau_{tr}$              | pre/post trace time constant | 20    | ms   |
| $\lambda_p$              | Potentiation learning rate   | 0     | —    |
| $\lambda_d$              | Depression learning rate     | 0     | —    |

| E: Input           |                                                      |
|--------------------|------------------------------------------------------|
| Type               | Description                                          |
| Poisson generators | Fixed rate $\nu_{ext}$ , $C_E$ generators per neuron |

| F: Measurements |
|-----------------|
| Spike activity  |

Table S3: Tabular description of the balanced network in Section 3.2.1.
